# Supplementary material for: Binding Site Identification and Flexible Docking of Single Stranded RNA to Proteins Using a Fragment-Based Approach
Source: PubMed Central journal article supplement (PMC4729675; doi:10.1371/journal.pcbi.1004697), 2016-01-27
Supplement: pcbi.1004697.s004.pdf [file pcbi.1004697.s004.pdf]

**S1 Table. Effect of chains length on unbound docking results.** Percentage of poses within 5 Å of the nearest bound fragment, among the poses obtained by unbound docking, before (“no-filter” columns) and after (“x-frag chains” columns) selection of chain-forming fragments.

|      | no-filter | 6-frag chains | 5-frag chains | 4-frag chains |
|------|-----------|---------------|---------------|---------------|
| 1B7F | 4 %       | 14 %          | 13 %          | 16 %          |
| 1CVJ | 3 %       | 10 %          | 10 %          | 11 %          |
